# Supplementary material
Source: PubMed Central journal article supplement (PMC3072876)
Supplement: supp_blood-2010-07-297689_Document1.pdf [file supp_blood-2010-07-297689_Document1.pdf]

**Table S1. Genes overexpressed in E47 deficient versus wild type HSCs****Primary adoptive transfer**

| Gene          | Probe ID     | J5     | FC     | annotation                                                                                                                                                                      |
|---------------|--------------|--------|--------|---------------------------------------------------------------------------------------------------------------------------------------------------------------------------------|
| D3ErtD300e    | A_52_P92514  | 22.705 | 49.035 | Mus musculus DNA segment, Chr 3, ERATO Doi 300, expressed, mRNA (cDNA clone MGC:64649 IMAGE:6400922), complete cds. [BC052702]                                                  |
| Acacb         | A_52_P340167 | 23.413 | 39.242 | Mus musculus acetyl-Coenzyme A carboxylase beta (Acacb), mRNA [NM_133904]                                                                                                       |
| Pold1         | A_52_P333178 | 24.622 | 35.035 | Mus musculus polymerase (DNA directed), delta 1, catalytic subunit (Pold1), mRNA [NM_011131]                                                                                    |
| NAP123917-1   | A_52_P256656 | 20.396 | 33.549 | Unknown                                                                                                                                                                         |
| Gbp6          | A_51_P463846 | 20.14  | 32.820 | Mus musculus guanylate binding protein 6 (Gbp6), mRNA [NM_145545]                                                                                                               |
| Emilin1       | A_51_P222359 | 22.454 | 24.993 | Mus musculus elastin microfibril interfacer 1 (Emilin1), mRNA [NM_133918]                                                                                                       |
| Gcs1          | A_51_P188666 | 20.738 | 17.272 | Mus musculus glucosidase 1 (Gcs1), mRNA [NM_020619]                                                                                                                             |
| Nucb1         | A_51_P433733 | 23.806 | 13.194 | Mus musculus nucleobindin 1 (Nucb1), mRNA [NM_008749]                                                                                                                           |
| NAP043517-1   | A_52_P350138 | 24.971 | 10.383 | Unknown                                                                                                                                                                         |
| Zfp212        | A_51_P135004 | 23.427 | 10.259 | Mus musculus Zinc finger protein 212 (Zfp212), mRNA [NM_145576]                                                                                                                 |
| Edf1          | A_51_P160567 | 20.548 | 9.412  | Mus musculus endothelial differentiation-related factor 1 (Edf1), mRNA [NM_021519]                                                                                              |
| 2410104I19Rik | A_51_P177583 | 23.028 | 7.301  | Mus musculus RIKEN cDNA 2410104I19 gene (2410104I19Rik), transcript variant 2, mRNA [NM_133691]                                                                                 |
| Sec24c        | A_51_P186564 | 21.785 | 7.194  | Mus musculus SEC24 related gene family, member C (S. cerevisiae) (Sec24c), mRNA [NM_172596]                                                                                     |
| Ccs           | A_51_P193536 | 25.171 | 6.635  | Mus musculus copper chaperone for superoxide dismutase (Ccs), mRNA [NM_016892]                                                                                                  |
| H2-Ke2        | A_51_P368855 | 33.855 | 5.873  | Mus musculus H2-K region expressed gene 2 (H2-Ke2), mRNA [NM_010385]                                                                                                            |
| Maz           | A_52_P253843 | 22.484 | 5.195  | Mus musculus MYC-associated zinc finger protein (purine-binding transcription factor) (Maz), mRNA [NM_010772]                                                                   |
| BI133744      | A_52_P549954 | 20.242 | 4.885  | UI-M-BH3-bsc-d-11-0-UI.s1 NIH_BMAP_M_S4 Mus musculus cDNA clone UI-M-BH3-bsc-d-11-0-UI 3', mRNA sequence [BI133744]                                                             |
| Chd4          | A_51_P454280 | 30.563 | 4.602  | Mus musculus chromodomain helicase DNA binding protein 4 (Chd4), mRNA [NM_145979]                                                                                               |
| Ddb1          | A_51_P459538 | 24.004 | 4.509  | Mus musculus damage specific DNA binding protein 1 (Ddb1), mRNA [NM_015735]                                                                                                     |
| Slc25a27      | A_52_P104091 | 20.816 | 4.407  | Mus musculus solute carrier family 25, member 27 (Slc25a27), mRNA [NM_028711]                                                                                                   |
| Cct8          | A_52_P456279 | 25.102 | 4.039  | Mus musculus chaperonin subunit 8 (theta) (Cct8), mRNA [NM_009840]                                                                                                              |
| Tap2          | A_52_P86176  | 23.634 | 3.851  | Mus musculus transporter 2, ATP-binding cassette, sub-family B (MDR/TAP) (Tap2), mRNA [NM_011530]                                                                               |
| Hspa8         | A_52_P12877  | 26.121 | 3.771  | Mus musculus heat shock protein 8 (Hspa8), mRNA [NM_031165]                                                                                                                     |
| Noc2l         | A_52_P497193 | 28.601 | 3.755  | Mus musculus nucleolar complex associated 2 homolog (S. cerevisiae) (Noc2l), mRNA [NM_021303]                                                                                   |
| NAP107236-1   | A_52_P80305  | 21.853 | 3.376  | Unknown                                                                                                                                                                         |
| Pabpn1        | A_52_P743305 | 20.285 | 3.348  | Mus musculus adult male urinary bladder cDNA, RIKEN full-length enriched library, clone:9530063N22 product:poly(A) binding protein, nuclear 1, full insert sequence. [AK137240] |
| Ptges3        | A_51_P474367 | 21.903 | 3.133  | Mus musculus prostaglandin E synthase 3 (cytosolic) (Ptges3), mRNA [NM_019766]                                                                                                  |
| Tuba4a        | A_52_P409498 | 20.944 | 3.090  | Mus musculus tubulin, alpha 4A (Tuba4a), mRNA [NM_009447]                                                                                                                       |
| AF085738      | A_51_P193053 | 25.133 | 3.045  | Mus musculus Sang mRNA, complete cds. [AF085738]                                                                                                                                |
| Pabpn1        | A_52_P64783  | 24.196 | 2.949  | Mus musculus adult male olfactory brain cDNA, RIKEN full-length enriched library, clone:6430407F06 product:poly(A) binding protein, nuclear 1, full insert sequence. [AK032172] |
| H2-K1         | A_52_P474242 | 22.191 | 2.943  | Mus musculus histocompatibility 2, K1, K region (H2-K1), transcript variant 1, mRNA [NM_001001892]                                                                              |
| TC1765066     | A_52_P473172 | 23.753 | 2.912  | Q6QAQ1_PIG (Q6QAQ1) Cytoskeletal beta actin (Fragment), partial (60%) [TC1765066]                                                                                               |

| Gene               | Probe ID     | J5     | FC    | annotation                                                                                                                                     |
|--------------------|--------------|--------|-------|------------------------------------------------------------------------------------------------------------------------------------------------|
| NAP123700-1        | A_52_P399536 | 30.113 | 2.868 | Unknown                                                                                                                                        |
| Ndufa5             | A_51_P170156 | 20.573 | 2.857 | Mus musculus NADH dehydrogenase (ubiquinone) 1 alpha subcomplex, 5 (Ndufa5), mRNA [NM_026614]                                                  |
| ENSMUST00000077662 | A_51_P191463 | 23.437 | 2.771 | histocompatibility 2, M region locus 2 [Source:MarkerSymbol;Acc:MGI:95914] [ENSMUST00000077662]                                                |
| NAP027924-1        | A_52_P57582  | 40.609 | 2.757 | Unknown                                                                                                                                        |
| Lmo2               | A_51_P223686 | 24.184 | 2.729 | Mus musculus LIM domain only 2 (Lmo2), mRNA [NM_008505]                                                                                        |
| Fus                | A_52_P320032 | 27.101 | 2.654 | Mus musculus fusion, derived from t(12;16) malignant liposarcoma (human) (Fus), mRNA [NM_139149]                                               |
| Ak2                | A_52_P68101  | 22.528 | 2.629 | Mus musculus adenylate kinase 2 (Ak2), transcript variant 2, mRNA [NM_016895]                                                                  |
| Nsbp1              | A_52_P498608 | 41.233 | 2.610 | Mus musculus nucleosome binding protein 1 (Nsbp1), mRNA [NM_016710]                                                                            |
| LOC625815          | A_52_P649064 | 36.985 | 2.604 | PREDICTED: Mus musculus similar to ATP synthase, H+ transporting, mitochondrial F0 complex, subunit f, isoform 2 (LOC625815), mRNA [XM_890383] |
| 2410016F19Rik      | A_52_P627793 | 20.616 | 2.579 | Mus musculus RIKEN cDNA 2410016F19 gene (2410016F19Rik), mRNA [NM_026113]                                                                      |
| Shfm1              | A_51_P180032 | 21.835 | 2.567 | Mus musculus split hand/foot malformation (ectrodactyly) type 1 (Shfm1), mRNA [NM_009169]                                                      |
| Cd63               | A_51_P511810 | 20.516 | 2.567 | Mus musculus Cd63 antigen (Cd63), transcript variant 2, mRNA [NM_007653]                                                                       |
| H2-Q2              | A_51_P219789 | 33.799 | 2.546 | Mus musculus histocompatibility 2, Q region locus 2 (H2-Q2), mRNA [NM_010392]                                                                  |
| EG630499           | A_51_P444565 | 22.866 | 2.538 | Mus musculus predicted gene, EG630499 (EG630499), mRNA [NM_001081015]                                                                          |
| Cfl1               | A_52_P477720 | 22.378 | 2.499 | Mus musculus cofilin 1, non-muscle (Cfl1), mRNA [NM_007687]                                                                                    |
| TC1629641          | A_51_P400752 | 44.67  | 2.468 | Q31216_MOUSE (Q31216) Class I (Qa) Q5-k antigen, complete [TC1629641]                                                                          |
| Fus                | A_51_P512364 | 34.236 | 2.438 | Mus musculus fusion, derived from t(12;16) malignant liposarcoma (human) (Fus), mRNA [NM_139149]                                               |
| Atp5j2             | A_51_P224216 | 46.981 | 2.430 | Mus musculus ATP synthase, H+ transporting, mitochondrial F0 complex, subunit f, isoform 2 (Atp5j2), mRNA [NM_020582]                          |
| H2-D1              | A_52_P313279 | 44.732 | 2.423 | Mus musculus histocompatibility 2, D region locus 1 (H2-D1), mRNA [NM_010380]                                                                  |
| H2-Q10             | A_51_P496997 | 53.291 | 2.408 | Mus musculus histocompatibility 2, Q region locus 10 (H2-Q10), mRNA [NM_010391]                                                                |
| NAP056541-1        | A_52_P600750 | 41.046 | 2.352 | Unknown                                                                                                                                        |
| Rps3               | A_51_P318642 | 26.146 | 2.324 | Mus musculus ribosomal protein S3 (Rps3), mRNA [NM_012052]                                                                                     |
| Actb               | A_51_P173760 | 44.613 | 2.321 | Mus musculus actin, beta, cytoplasmic (Actb), mRNA [NM_007393]                                                                                 |
| Atp5h              | A_51_P264186 | 22.103 | 2.310 | Mus musculus ATP synthase, H+ transporting, mitochondrial F0 complex, subunit d (Atp5h), mRNA [NM_027862]                                      |
| Ifitm1             | A_52_P541802 | 31.675 | 2.234 | Mus musculus interferon induced transmembrane protein 1 (Ifitm1), mRNA [NM_026820]                                                             |
| Ramp2              | A_51_P394383 | 36.673 | 2.233 | Mus musculus nuclear enriched abundant transcript 2 (Neat2) mRNA, complete sequence [EF177380]                                                 |
| Sfrs1              | A_51_P485899 | 21.941 | 2.215 | Mus musculus splicing factor, arginine/serine-rich 1 (ASF/SF2) (Sfrs1), transcript variant 1, mRNA [NM_173374]                                 |
| Set                | A_52_P50107  | 21.004 | 2.192 | Mus musculus SET translocation (Set), mRNA [NM_023871]                                                                                         |
| Ramp2              | A_51_P377045 | 30.363 | 2.180 | Mus musculus nuclear enriched abundant transcript 2 (Neat2) mRNA, complete sequence [EF177380]                                                 |
| H2-Q7              | A_51_P262079 | 31.962 | 2.173 | Mus musculus histocompatibility 2, Q region locus 7 (H2-Q7), mRNA [NM_010394]                                                                  |
| Gpx1               | A_52_P684378 | 28.113 | 2.169 | Mus musculus glutathione peroxidase 1 (Gpx1), mRNA [NM_008160]                                                                                 |
| NAP092627-001      | A_52_P382485 | 24.802 | 2.144 | Unknown                                                                                                                                        |
| Rpl13a             | A_51_P235311 | 20.117 | 2.118 | Mus musculus ribosomal protein L13a (Rpl13a), mRNA [NM_009438]                                                                                 |
| Ncl                | A_51_P134007 | 32.737 | 2.094 | Mus musculus nucleolin (Ncl), mRNA [NM_010880]                                                                                                 |
| Ncl                | A_52_P623337 | 34.236 | 2.002 | Mus musculus nucleolin (Ncl), mRNA [NM_010880]                                                                                                 |
| NAP123925-1        | A_52_P353242 | 29.488 | 1.990 | Unknown                                                                                                                                        |
| Rpl19              | A_52_P547021 | 26.302 | 1.915 | Mus musculus ribosomal protein L19 (Rpl19), mRNA                                                                                               |

| Gene               | Probe ID     | J5     | FC    | annotation                                                                                                                                                                      |
|--------------------|--------------|--------|-------|---------------------------------------------------------------------------------------------------------------------------------------------------------------------------------|
|                    |              |        |       | [NM_009078]                                                                                                                                                                     |
| 2010107E04Rik      | A_51_P128287 | 21.866 | 1.909 | Mus musculus RIKEN cDNA 2010107E04 gene (2010107E04Rik), mRNA [NM_027360]                                                                                                       |
| Ubc                | A_52_P238556 | 24.596 | 1.909 | Mus musculus 17 days embryo kidney cDNA, RIKEN full-length enriched library, clone:I920021C12 product:ubiquitin C, full insert sequence. [AK168448]                             |
| H2-T23             | A_51_P237754 | 26.489 | 1.860 | Mus musculus histocompatibility 2, T region locus 23 (H2-T23), mRNA [NM_010398]                                                                                                 |
| Rpl29              | A_52_P505977 | 20.554 | 1.855 | Mus musculus ribosomal protein L29 (Rpl29), mRNA [NM_009082]                                                                                                                    |
| Hnrpa1             | A_51_P296940 | 26.077 | 1.850 | Mus musculus heterogeneous nuclear ribonucleoprotein A1 (Hnrpa1), transcript variant 2, mRNA [NM_001039129]                                                                     |
| ENSMUST00000078297 | A_52_P497503 | 20.367 | 1.845 | ribosomal protein S2 [Source:MarkerSymbol;Acc:MGI:105110] [ENSMUST00000078297]                                                                                                  |
| Rps2               | A_52_P277592 | 24.053 | 1.839 | Mus musculus ribosomal protein S2 (Rps2), mRNA [NM_008503]                                                                                                                      |
| Rpl10              | A_52_P171216 | 22.241 | 1.828 | Mus musculus strain BALB/c QM protein mRNA, partial cds. [U89405]                                                                                                               |
| BC012020           | A_52_P321318 | 57.539 | 1.821 | Mus musculus cDNA clone IMAGE:4500967, with apparent retained intron. [BC012020]                                                                                                |
| Snrpd1             | A_51_P193254 | 26.989 | 1.799 | Mus musculus small nuclear ribonucleoprotein D1 (Snrpd1), mRNA [NM_009226]                                                                                                      |
| TC1712793          | A_52_P127892 | 36.548 | 1.786 | NM_206272 CG11624-PC, isoform C {Drosophila melanogaster} (exp=-1; wgp=0; cg=0), partial (23%) [TC1712793]                                                                      |
| Rps3               | A_52_P768    | 28.426 | 1.758 | Mus musculus ribosomal protein S3 (Rps3), mRNA [NM_012052]                                                                                                                      |
| ENSMUST00000100152 | A_52_P40168  | 42.733 | 1.741 | Unknown                                                                                                                                                                         |
| Sfrs5              | A_52_P50090  | 21.679 | 1.738 | Mus musculus splicing factor, arginine/serine-rich 5 (SRp40, HRS) (Sfrs5), transcript variant 3, mRNA [NM_009159]                                                               |
| Actb               | A_51_P251154 | 26.864 | 1.729 | Mus musculus cDNA clone IMAGE:4501052 [BC016624]                                                                                                                                |
| Rpl29              | A_51_P400137 | 31.05  | 1.722 | Mus musculus ribosomal protein L29 (Rpl29), mRNA [NM_009082]                                                                                                                    |
| H2-D1              | A_51_P496996 | 25.49  | 1.722 | Mus musculus histocompatibility 2, D region locus 1 (H2-D1), mRNA [NM_010380]                                                                                                   |
| BC012020           | A_52_P845178 | 30.113 | 1.691 | Mus musculus cDNA clone IMAGE:4500967, with apparent retained intron. [BC012020]                                                                                                |
| Ybx1               | A_52_P187132 | 24.053 | 1.677 | Mus musculus Y box protein 1 (Ybx1), mRNA [NM_011732]                                                                                                                           |
| H2-Q1              | A_52_P582814 | 21.366 | 1.650 | Mus musculus 16 days neonate thymus cDNA, RIKEN full-length enriched library, clone:A130027C03 product:histocompatibility 2, Q region locus 4, full insert sequence. [AK037574] |
| Anp32a             | A_51_P499755 | 23.178 | 1.633 | Mus musculus acidic (leucine-rich) nuclear phosphoprotein 32 family, member A (Anp32a), mRNA [NM_009672]                                                                        |
| Rpl29              | A_52_P217069 | 23.303 | 1.632 | Mus musculus ribosomal protein L29 (Rpl29), mRNA [NM_009082]                                                                                                                    |
| Hnrpa3             | A_51_P443482 | 25.989 | 1.625 | Mus musculus heterogeneous nuclear ribonucleoprotein A3 (Hnrpa3), transcript variant b, mRNA [NM_146130]                                                                        |
| Ramp2              | A_52_P392598 | 30.425 | 1.623 | Mus musculus nuclear enriched abundant transcript 2 (Neat2) mRNA, complete sequence [EF177380]                                                                                  |
| Rps29              | A_52_P158090 | 20.741 | 1.617 | Mus musculus ribosomal protein S29 (Rps29), mRNA [NM_009093]                                                                                                                    |
| Rpl37a             | A_51_P441263 | 22.616 | 1.617 | Mus musculus ribosomal protein L37a (Rpl37a), mRNA [NM_009084]                                                                                                                  |
| Ptma               | A_52_P249402 | 23.678 | 1.601 | Mus musculus prothymosin alpha (Ptma), mRNA [NM_008972]                                                                                                                         |
| Eef1g              | A_52_P609138 | 37.735 | 1.561 | Mus musculus eukaryotic translation elongation factor 1 gamma (Eef1g), mRNA [NM_026007]                                                                                         |
| CYTB               | A_51_P315595 | 22.116 | 1.545 | cytochrome b, mitochondrial [Source:MarkerSymbol;Acc:MGI:102501] [ENSMUST00000082421]                                                                                           |
| Rpl28              | A_51_P339103 | 27.051 | 1.541 | Mus musculus ribosomal protein L28 (Rpl28), mRNA [NM_009081]                                                                                                                    |
| Rpl18              | A_52_P436621 | 33.236 | 1.463 | Mus musculus ribosomal protein L18 (Rpl18), mRNA [NM_009077]                                                                                                                    |
| Rpl3               | A_51_P519024 | 21.366 | 1.462 | Mus musculus ribosomal protein L3 (Rpl3), mRNA [NM_013762]                                                                                                                      |
| LOC622592          | A_52_P18596  | 27.114 | 1.447 | PREDICTED: Mus musculus similar to heterogeneous nuclear ribonucleoprotein A3 (LOC622592), mRNA [XR_003667]                                                                     |

| Gene   | Probe ID     | J5     | FC    | annotation                                                                                        |
|--------|--------------|--------|-------|---------------------------------------------------------------------------------------------------|
| Rpl19  | A_51_P415162 | 23.365 | 1.425 | Mus musculus ribosomal protein L19 (Rpl19), mRNA [NM_009078]                                      |
| Rpl37  | A_52_P150675 | 23.053 | 1.380 | Mus musculus ribosomal protein L37 (Rpl37), mRNA [NM_026069]                                      |
| Mid1   | A_51_P510284 | 39.484 | 1.370 | Mus musculus midline 1, mRNA (cDNA clone MGC:69759 IMAGE:6810837), complete cds. [BC059027]       |
| Rpl18a | A_51_P446229 | 37.297 | 1.367 | Mus musculus Ribosomal protein L18A (Rpl18a), mRNA [NM_029751]                                    |
| Pif1   | A_51_P467448 | 20.179 | 1.312 | Mus musculus PIF1 5'-to-3' DNA helicase homolog ( <i>S. cerevisiae</i> ) (Pif1), mRNA [NM_172453] |
| Rps18  | A_52_P193899 | 33.611 | 1.305 | Mus musculus ribosomal protein S18 (Rps18), mRNA [NM_011296]                                      |
| Gas5   | A_51_P366867 | 20.429 | 1.298 | M.musculus mRNA for gas5 growth arrest specific protein. [X59728]                                 |
| Rpl22  | A_51_P387878 | 22.241 | 1.213 | Mus musculus ribosomal protein L22 (Rpl22), mRNA [NM_009079]                                      |

### Secondary adoptve transfer

| Gene               | Probe ID      | J5     | FC       | annotation                                                                                                                                                        |
|--------------------|---------------|--------|----------|-------------------------------------------------------------------------------------------------------------------------------------------------------------------|
| ENSMUSG00000075275 | A_52_P1107697 | 31.187 | 5428.067 | Mus musculus 13 days embryo male testis cDNA, RIKEN full-length enriched library, clone:6030499A19 product:hypothetical protein, full insert sequence. [AK031731] |
| Amy1               | A_51_P383638  | 39.807 | 1066.361 | Mus musculus amylase 1, salivary (Amy1), mRNA [NM_007446]                                                                                                         |
| Rit1               | A_52_P515370  | 33.252 | 212.007  | Mus musculus TIB-55 BB88 cDNA, RIKEN full-length enriched library, clone:l730071O05 product:Ras-like without CAAX 1, full insert sequence [AK168254]              |
| Eftud1             | A_52_P378719  | 36.503 | 191.127  | Mus musculus elongation factor Tu GTP binding domain containing 1 (Eftud1), mRNA [NM_175317]                                                                      |
| Tyrobp             | A_51_P261517  | 35.544 | 151.389  | Mus musculus TYRO protein tyrosine kinase binding protein (Tyrobp), mRNA [NM_011662]                                                                              |
| Gsta4              | A_51_P112223  | 33.529 | 115.023  | Mus musculus glutathione S-transferase, alpha 4 (Gsta4), mRNA [NM_010357]                                                                                         |
| Stx5a              | A_51_P294550  | 36.344 | 105.681  | Mus musculus syntaxin 5A (Stx5a), mRNA [NM_019829]                                                                                                                |
| 1810054D07Rik      | A_52_P131458  | 33.153 | 82.624   | Mus musculus RIKEN cDNA 1810054D07 gene (1810054D07Rik), mRNA [NM_027238]                                                                                         |
| D0HXS9928E         | A_51_P368557  | 30.45  | 64.254   | Mus musculus DNA segment, human DXS9928E (D0HXS9928E), mRNA [NM_138607]                                                                                           |
| Zfp110             | A_51_P475298  | 33.96  | 60.423   | Mus musculus zinc finger protein 110 (Zfp110), mRNA [NM_022981]                                                                                                   |
| ENSMUST00000103291 | A_51_P210310  | 33.885 | 58.639   | T-cell receptor beta C gene segment [Source:IMGT/GENE_DB;Acc:TRBC1] [ENSMUST00000103291]                                                                          |
| Amy1               | A_51_P383644  | 41.14  | 51.613   | Mus musculus amylase 1, salivary (Amy1), mRNA [NM_007446]                                                                                                         |
| Stxbp4             | A_52_P401783  | 34.302 | 51.369   | Mus musculus 13 days embryo male testis cDNA, RIKEN full-length enriched library, clone:6030470M02 product:unclassifiable, full insert sequence. [AK031650]       |
| Il17ra             | A_52_P31577   | 42.764 | 45.330   | Mus musculus interleukin 17 receptor A (Il17ra), mRNA [NM_008359]                                                                                                 |
| Gpr125             | A_51_P462102  | 31.294 | 45.152   | Mus musculus G protein-coupled receptor 125, mRNA (cDNA clone IMAGE:5718990), partial cds. [BC052391]                                                             |
| ORF5               | A_51_P371255  | 40.054 | 36.632   | Mus musculus open reading frame 5 (ORF5), mRNA [NM_016924]                                                                                                        |
| Spsb3              | A_52_P613418  | 31.043 | 32.103   | Mus musculus splA/ryanodine receptor domain and SOCS box containing 3 (Spsb3), mRNA [NM_027141]                                                                   |
| Cxxc1              | A_51_P262533  | 44.291 | 27.948   | Mus musculus CXXC finger 1 (PHD domain) (Cxxc1), mRNA [NM_028868]                                                                                                 |
| Crnk1              | A_52_P440102  | 33.333 | 23.617   | Mus musculus Crn, crooked neck-like 1 ( <i>Drosophila</i> ) (Crnk1), mRNA [NM_025820]                                                                             |
| Slc22a17           | A_51_P111907  | 58.883 | 20.591   | Mus musculus solute carrier family 22 (organic cation transporter), member 17 (Slc22a17), mRNA [NM_021551]                                                        |
| 1500032D16Rik      | A_52_P175897  | 32.659 | 19.328   | Mus musculus RIKEN cDNA 1500032D16 gene (1500032D16Rik), transcript variant 1, mRNA [NM_030087]                                                                   |

| Gene          | Probe ID     | J5     | FC     | annotation                                                                                                                                          |
|---------------|--------------|--------|--------|-----------------------------------------------------------------------------------------------------------------------------------------------------|
| Med11         | A_51_P349803 | 32.04  | 17.034 | Mus musculus mediator of RNA polymerase II transcription, subunit 11 homolog ( <i>S. cerevisiae</i> ) (Med11), mRNA [NM_025397]                     |
| Ngp           | A_52_P429450 | 38.087 | 16.907 | Mus musculus neutrophilic granule protein (Ngp), mRNA [NM_008694]                                                                                   |
| Mrps12        | A_51_P506937 | 38.989 | 14.729 | Mus musculus mitochondrial ribosomal protein S12 (Mrps12), mRNA [NM_011885]                                                                         |
| Stx4a         | A_51_P495492 | 43.442 | 14.296 | Mus musculus syntaxin 4A (placental) (Stx4a), mRNA [NM_009294]                                                                                      |
| Dctn2         | A_51_P435333 | 35.429 | 13.655 | Mus musculus dynactin 2 (Dctn2), mRNA [NM_027151]                                                                                                   |
| Ppp4c         | A_51_P208394 | 31.356 | 13.611 | Mus musculus protein phosphatase 4, catalytic subunit (Ppp4c), mRNA [NM_019674]                                                                     |
| Aup1          | A_51_P165984 | 41.883 | 13.020 | Mus musculus ancient ubiquitous protein (Aup1), mRNA [NM_007517]                                                                                    |
| Klf6          | A_51_P503162 | 39.186 | 12.125 | Mus musculus Kruppel-like factor 6 (Klf6), mRNA [NM_011803]                                                                                         |
| Msi2          | A_52_P628060 | 37.001 | 11.821 | Mus musculus Musashi homolog 2 ( <i>Drosophila</i> ) (Msi2), mRNA [NM_054043]                                                                       |
| Tmem142c      | A_51_P188602 | 46.364 | 10.919 | Mus musculus transmembrane protein 142C (Tmem142c), mRNA [NM_198424]                                                                                |
| Tom1l2        | A_52_P383753 | 37.696 | 10.514 | Mus musculus target of myb1-like 2 (chicken) (Tom1l2), transcript variant 1, mRNA [NM_153080]                                                       |
| Zfp410        | A_51_P369897 | 35.66  | 10.438 | Mus musculus zinc finger protein 410 (Zfp410), mRNA [NM_144833]                                                                                     |
| Mrps35        | A_51_P110841 | 33.607 | 10.416 | Mus musculus mitochondrial ribosomal protein S35 (Mrps35), mRNA [NM_145573]                                                                         |
| Os9           | A_51_P109171 | 30.236 | 10.241 | Mus musculus amplified in osteosarcoma (Os9), mRNA [NM_177614]                                                                                      |
| Banf1         | A_51_P314019 | 31.417 | 8.840  | Mus musculus barrier to autointegration factor 1 (Banf1), transcript variant 1, mRNA [NM_011793]                                                    |
| Prdx2         | A_52_P893440 | 38.154 | 8.253  | Mus musculus peroxiredoxin 2 (Prdx2), mRNA [NM_011563]                                                                                              |
| H2afy         | A_52_P402989 | 36.565 | 7.260  | Mus musculus H2A histone family, member Y (H2afy), mRNA [NM_012015]                                                                                 |
| Itfg2         | A_52_P252469 | 41.524 | 7.046  | Mus musculus integrin alpha FG-GAP repeat containing 2 (Itfg2), mRNA [NM_133927]                                                                    |
| S100a8        | A_51_P256827 | 37.806 | 6.554  | Mus musculus S100 calcium binding protein A8 (calgranulin A) (S100a8), mRNA [NM_013650]                                                             |
| Lrmp          | A_51_P130079 | 33.022 | 6.551  | Mus musculus lymphoid-restricted membrane protein (Lrmp), mRNA [NM_008511]                                                                          |
| Leprot        | A_51_P394690 | 30.661 | 6.341  | Mus musculus leptin receptor overlapping transcript (Leprot), mRNA [NM_175036]                                                                      |
| Angptl6       | A_51_P259571 | 51.347 | 6.122  | Mus musculus angiopoietin-like 6 (Angptl6), mRNA [NM_145154]                                                                                        |
| Fxyd5         | A_51_P381260 | 30.245 | 5.938  | Mus musculus FXD domain-containing ion transport regulator 5 (Fxyd5), mRNA [NM_008761]                                                              |
| Eef1d         | A_51_P493079 | 30.976 | 5.896  | Mus musculus eukaryotic translation elongation factor 1 delta (guanine nucleotide exchange protein) (Eef1d), transcript variant 2, mRNA [NM_023240] |
| Prdx2         | A_52_P550034 | 44.699 | 5.876  | Mus musculus peroxiredoxin 2 (Prdx2), mRNA [NM_011563]                                                                                              |
| NAP107236-1   | A_52_P80305  | 37.749 | 5.344  | Unknown                                                                                                                                             |
| Cct8          | A_52_P456279 | 33.327 | 5.195  | Mus musculus chaperonin subunit 8 (theta) (Cct8), mRNA [NM_009840]                                                                                  |
| Calr          | A_52_P672212 | 53.433 | 5.137  | Mus musculus calreticulin (Calr), mRNA [NM_007591]                                                                                                  |
| 1700029I01Rik | A_52_P581100 | 30.403 | 5.005  | Mus musculus RIKEN cDNA 1700029I01 gene (1700029I01Rik), mRNA [NM_027285]                                                                           |
| Gdi2          | A_52_P1073   | 38.89  | 4.531  | Mus musculus guanosine diphosphate (GDP) dissociation inhibitor 2 (Gdi2), mRNA [NM_008112]                                                          |
| S100a9        | A_51_P402943 | 37.489 | 4.517  | Mus musculus S100 calcium binding protein A9 (calgranulin B) (S100a9), mRNA [NM_009114]                                                             |
| Cfp           | A_51_P408363 | 39.797 | 4.425  | Mus musculus complement factor properdin (Cfp), mRNA [NM_008823]                                                                                    |
| EG433225      | A_52_P68714  | 31.484 | 4.369  | Unknown                                                                                                                                             |
| Pabpn1        | A_52_P869483 | 35.006 | 3.964  | Mus musculus poly(A) binding protein, nuclear 1 (Pabpn1), mRNA [NM_019402]                                                                          |
| Pabpn1        | A_51_P228916 | 40.595 | 3.919  | Mus musculus poly(A) binding protein, nuclear 1 (Pabpn1), mRNA [NM_019402]                                                                          |
| Laptm5        | A_51_P401668 | 43.969 | 3.692  | Mus musculus lysosomal-associated protein transmembrane 5                                                                                           |

| Gene               | Probe ID      | J5     | FC    | annotation                                                                                                                                                                                                                                                  |
|--------------------|---------------|--------|-------|-------------------------------------------------------------------------------------------------------------------------------------------------------------------------------------------------------------------------------------------------------------|
|                    |               |        |       | (Lapm5), mRNA [NM_010686]                                                                                                                                                                                                                                   |
| Tubb2a             | A_52_P621603  | 54.189 | 3.471 | Mus musculus tubulin, beta 2a (Tubb2a), mRNA [NM_009450]                                                                                                                                                                                                    |
| Hmox2              | A_52_P477819  | 33.83  | 3.147 | Mus musculus heme oxygenase (decycling) 2 (Hmox2), mRNA [NM_010443]                                                                                                                                                                                         |
| BC012020           | A_52_P845178  | 61.492 | 3.094 | Mus musculus cDNA clone IMAGE:4500967, with apparent retained intron. [BC012020]                                                                                                                                                                            |
| Sult1a1            | A_51_P321341  | 31.196 | 3.081 | Mus musculus sulfotransferase family 1A, phenol-preferring, member 1 (Sult1a1), mRNA [NM_133670]                                                                                                                                                            |
| BC012020           | A_52_P321318  | 99.084 | 3.010 | Mus musculus cDNA clone IMAGE:4500967, with apparent retained intron. [BC012020]                                                                                                                                                                            |
| Tubb5              | A_52_P163796  | 41.7   | 2.940 | Mus musculus tubulin, beta 5 (Tubb5), mRNA [NM_011655]                                                                                                                                                                                                      |
| Ncl                | A_52_P623337  | 48.861 | 2.784 | Mus musculus nucleolin (Ncl), mRNA [NM_010880]                                                                                                                                                                                                              |
| OTTMUSG00000015730 | A_52_P522864  | 36.168 | 2.761 | Mus musculus predicted gene, OTTMUSG00000015730, mRNA (cDNA clone MGC:38507 IMAGE:5352880), complete cds. [BC023805]                                                                                                                                        |
| Hdgf               | A_51_P425080  | 31.429 | 2.749 | Mus musculus hepatoma-derived growth factor (Hdgf), mRNA [NM_008231]                                                                                                                                                                                        |
| Ncl                | A_51_P134007  | 41.88  | 2.743 | Mus musculus nucleolin (Ncl), mRNA [NM_010880]                                                                                                                                                                                                              |
| Tubb5              | A_52_P163795  | 35.134 | 2.703 | Mus musculus tubulin, beta 5 (Tubb5), mRNA [NM_011655]                                                                                                                                                                                                      |
| ND4L               | A_51_P245525  | 39.148 | 2.699 | Mus musculus lung RCB-0558 LLC cDNA, RIKEN full-length enriched library, clone:G730042M17 product:NADH dehydrogenase 4, mitochondrial, full insert sequence. [AK144853]                                                                                     |
| Ptbp1              | A_51_P462692  | 30.717 | 2.678 | Mus musculus polypyrimidine tract binding protein 1 (Ptbp1), transcript variant 2, mRNA [NM_008956]                                                                                                                                                         |
| Pin4               | A_51_P270478  | 39.778 | 2.628 | Mus musculus protein (peptidyl-prolyl cis/trans isomerase) NIMA-interacting, 4 (parvulin) (Pin4), mRNA [NM_027181]                                                                                                                                          |
| H2-K1              | A_52_P474242  | 35.638 | 2.619 | Mus musculus histocompatibility 2, K1, K region (H2-K1), transcript variant 1, mRNA [NM_001001892]                                                                                                                                                          |
| Aldh2              | A_52_P116134  | 37.533 | 2.591 | Mus musculus aldehyde dehydrogenase 2, mitochondrial (Aldh2), mRNA [NM_009656]                                                                                                                                                                              |
| COX2               | A_51_P323880  | 32.847 | 2.491 | cytochrome c oxidase II, mitochondrial [Source:MarkerSymbol;Acc:MGI:102503] [ENSMUST00000082405]                                                                                                                                                            |
| Tpt1               | A_52_P667098  | 53.426 | 2.422 | Mus musculus tumor protein, translationally-controlled 1 (Tpt1), mRNA [NM_009429]                                                                                                                                                                           |
| CYTB               | A_51_P315595  | 44.542 | 2.370 | cytochrome b, mitochondrial [Source:MarkerSymbol;Acc:MGI:102501] [ENSMUST00000082421]                                                                                                                                                                       |
| Rpsa               | A_51_P439092  | 35.632 | 2.358 | Mus musculus ribosomal protein SA (Rpsa), mRNA [NM_011029]                                                                                                                                                                                                  |
| Actb               | A_51_P173760  | 47.069 | 2.301 | Mus musculus actin, beta, cytoplasmic (Actb), mRNA [NM_007393]                                                                                                                                                                                              |
| Hnrpa3             | A_51_P443482  | 36.848 | 2.290 | Mus musculus heterogeneous nuclear ribonucleoprotein A3 (Hnrpa3), transcript variant b, mRNA [NM_146130]                                                                                                                                                    |
| Acin1              | A_52_P223174  | 36.773 | 2.215 | Mus musculus 3 days neonate thymus cDNA, RIKEN full-length enriched library, clone:A630085P16 product:unclassifiable, full insert sequence. [AK042374]                                                                                                      |
| Rpl13              | A_52_P668076  | 39.98  | 2.214 | Mus musculus ribosomal protein L13 (Rpl13), mRNA [NM_016738]                                                                                                                                                                                                |
| H2-Q2              | A_51_P219789  | 30.169 | 2.098 | Mus musculus histocompatibility 2, Q region locus 2 (H2-Q2), mRNA [NM_010392]                                                                                                                                                                               |
| TC1622094          | A_52_P1157520 | 40.314 | 2.088 | G7C_MOUSE (Q9JHA8) Protein G7c precursor, partial (94%) [TC1622094]                                                                                                                                                                                         |
| Rpl28              | A_51_P339103  | 45.871 | 2.087 | Mus musculus ribosomal protein L28 (Rpl28), mRNA [NM_009081]                                                                                                                                                                                                |
| NAP027770-1        | A_52_P501387  | 55.802 | 2.054 | Unknown                                                                                                                                                                                                                                                     |
| EG545091           | A_52_P648203  | 30.364 | 2.052 | PREDICTED: Mus musculus similar to Heterogeneous nuclear ribonucleoprotein A1 (Helix-destabilizing protein) (Single-strand binding protein) (hnRNP core protein A1) (HDP-1) (Topoisomerase-inhibitor suppressed), transcript variant 1 (LOC545091), mRNA... |
| H2-T23             | A_51_P237754  | 38.814 | 2.044 | Mus musculus histocompatibility 2, T region locus 23 (H2-T23), mRNA [NM_010398]                                                                                                                                                                             |
| Ly6e               | A_51_P148814  | 37.623 | 2.039 | Mus musculus lymphocyte antigen 6 complex, locus E (Ly6e), mRNA [NM_008529]                                                                                                                                                                                 |

| Gene               | Probe ID      | J5     | FC    | annotation                                                                                                                                     |
|--------------------|---------------|--------|-------|------------------------------------------------------------------------------------------------------------------------------------------------|
| Rps10              | A_51_P169156  | 46.205 | 2.038 | Mus musculus ribosomal protein S10 (Rps10), mRNA [NM_025963]                                                                                   |
| Tmsb4x             | A_51_P224843  | 36.01  | 2.023 | Mus musculus thymosin, beta 4, X chromosome (Tmsb4x), mRNA [NM_021278]                                                                         |
| Rpl17              | A_52_P109109  | 54.668 | 1.968 | Mus musculus ribosomal protein L17 (Rpl17), mRNA [NM_001002239]                                                                                |
| ENSMUST00000099448 | A_52_P589148  | 37.422 | 1.907 | PREDICTED: Mus musculus similar to ribosomal protein S18 (LOC624596), mRNA [XM_988078]                                                         |
| Lrrc58             | A_52_P17228   | 30.73  | 1.896 | Mus musculus leucine rich repeat containing 58 (Lrrc58), mRNA [NM_177093]                                                                      |
| Ramp2              | A_52_P392598  | 31.902 | 1.878 | Mus musculus nuclear enriched abundant transcript 2 (Neat2) mRNA, complete sequence [EF177380]                                                 |
| NAP028769-1        | A_52_P623690  | 32.337 | 1.876 | Unknown                                                                                                                                        |
| Rpl35              | A_51_P132715  | 55.764 | 1.868 | Mus musculus ribosomal protein L35 (Rpl35), mRNA [NM_025592]                                                                                   |
| Rpl23              | A_52_P651894  | 50.597 | 1.835 | Mus musculus ribosomal protein L23 (Rpl23), mRNA [NM_022891]                                                                                   |
| A_52_P972871       | A_52_P972871  | 42.658 | 1.830 | Unknown                                                                                                                                        |
| LOC674833          | A_52_P378056  | 38.323 | 1.824 | PREDICTED: Mus musculus similar to 60S ribosomal protein L17 (L23) (Amino acid starvation-induced protein) (ASI) (LOC674833), mRNA [XM_978851] |
| ENSMUST00000096279 | A_52_P412046  | 33.414 | 1.817 | Unknown                                                                                                                                        |
| BC026852           | A_51_P153805  | 32.33  | 1.811 | Mus musculus, clone IMAGE:4191756, mRNA. [BC026852]                                                                                            |
| NAP018080-001      | A_52_P540302  | 47.132 | 1.785 | Unknown                                                                                                                                        |
| Rpl7               | A_52_P346326  | 47.951 | 1.778 | Mus musculus ribosomal protein L7 (Rpl7), mRNA [NM_011291]                                                                                     |
| TC1721764          | A_52_P1175491 | 48.518 | 1.753 | RL35_RAT (P17078) 60S ribosomal protein L35, partial (56%) [TC1721764]                                                                         |
| Rpl17              | A_52_P123268  | 36.861 | 1.740 | Mus musculus ribosomal protein L17 (Rpl17), mRNA [NM_001002239]                                                                                |
| Rps18              | A_52_P193899  | 64.712 | 1.737 | Mus musculus ribosomal protein S18 (Rps18), mRNA [NM_011296]                                                                                   |
| Rpl36a             | A_52_P481880  | 33.773 | 1.735 | Mus musculus ribosomal protein L36a (Rpl36a), mRNA [NM_019865]                                                                                 |
| NAP114245-1        | A_52_P479961  | 41.58  | 1.678 | Unknown                                                                                                                                        |
| Rpl32              | A_52_P573161  | 40.692 | 1.670 | Mus musculus ribosomal protein L32 (Rpl32), mRNA [NM_172086]                                                                                   |
| Rpl22              | A_51_P387878  | 52.551 | 1.670 | Mus musculus ribosomal protein L22 (Rpl22), mRNA [NM_009079]                                                                                   |
| Rpl34              | A_51_P243288  | 37.875 | 1.669 | Mus musculus ribosomal protein L34 (Rpl34), transcript variant 1, mRNA [NM_026724]                                                             |
| Rps23              | A_51_P376165  | 36.609 | 1.656 | Mus musculus ribosomal protein S23 (Rps23), mRNA [NM_024175]                                                                                   |
| NAP029896-1        | A_52_P178298  | 43.855 | 1.640 | Unknown                                                                                                                                        |
| H2-Q10             | A_51_P496997  | 30.371 | 1.630 | Mus musculus histocompatibility 2, Q region locus 10 (H2-Q10), mRNA [NM_010391]                                                                |
| LOC432594          | A_52_P146457  | 33.269 | 1.605 | PREDICTED: Mus musculus similar to 60S ribosomal protein L17 (L23) (Amino acid starvation-induced protein) (ASI) (LOC432594), mRNA [XM_484069] |
| Rpl19              | A_51_P415162  | 31.379 | 1.596 | Mus musculus ribosomal protein L19 (Rpl19), mRNA [NM_009078]                                                                                   |
| Rps26              | A_51_P302675  | 33.269 | 1.589 | Mus musculus ribosomal protein S26 (Rps26), mRNA [NM_013765]                                                                                   |
| Gas5               | A_51_P366867  | 36.168 | 1.587 | M.musculus mRNA for gas5 growth arrest specific protein. [X59728]                                                                              |
| Rpl37              | A_52_P150675  | 30.409 | 1.572 | Mus musculus ribosomal protein L37 (Rpl37), mRNA [NM_026069]                                                                                   |
| Rps21              | A_51_P489959  | 36.861 | 1.558 | Mus musculus ribosomal protein S21 (Rps21), mRNA [NM_025587]                                                                                   |
| NAP100007-001      | A_52_P375351  | 31.064 | 1.545 | Unknown                                                                                                                                        |
| Rps24              | A_51_P312936  | 44.485 | 1.524 | Mus musculus ribosomal protein S24 (Rps24), transcript variant 2, mRNA [NM_207634]                                                             |
| Rpl26              | A_51_P363515  | 45.745 | 1.467 | Mus musculus ribosomal protein L26 (Rpl26), mRNA [NM_009080]                                                                                   |

---

| <b>Gene</b> | <b>Probe ID</b> | <b>J5</b> | <b>FC</b> | <b>annotation</b>                                              |
|-------------|-----------------|-----------|-----------|----------------------------------------------------------------|
| Rpl18a      | A_51_P446229    | 42.91     | 1.442     | Mus musculus Ribosomal protein L18A (Rpl18a), mRNA [NM_029751] |

---



**Table S2. Genes underexpressed in E47 deficient versus wild type HSCs****Primary adoptive transfer**

| Gene          | Probe ID      | J5      | FC      | annotation                                                                                                                                               |
|---------------|---------------|---------|---------|----------------------------------------------------------------------------------------------------------------------------------------------------------|
| TC1687340     | A_52_P135885  | -37.348 | -10.461 | Q96CB9_HUMAN (Q96CB9) NOL1/NOP2/Sun domain family 4 protein, partial (14%) [TC1669140]                                                                   |
| NAP112463-1   | A_52_P115191  | -24.015 | -4.036  | Unknown                                                                                                                                                  |
| BC071254      | A_51_P249259  | -42.344 | -3.585  | Mus musculus cDNA clone IMAGE:5010343, partial cds. [BC071254]                                                                                           |
| AY036118      | A_52_P26797   | -21.154 | -3.179  | Mus musculus ETS-related transcription factor ERF (Erf1) mRNA, complete cds. [AY036118]                                                                  |
| TC1715318     | A_52_P315423  | -20.279 | -2.894  | Unknown                                                                                                                                                  |
| 1700066C05Rik | A_51_P327577  | -20.882 | -2.430  | Mus musculus adult male testis cDNA, RIKEN full-length enriched library, clone:1700066C05 product:hypothetical protein, full insert sequence. [AK018881] |
| RP23-64F17.3  | A_52_P254667  | -23.243 | -2.409  | Mus musculus similar to bM64F17.3 (putative novel protein) (LOC433728), mRNA [NM_001045534]                                                              |
| LOC671950     | A_52_P395962  | -24.864 | -2.318  | predicted gene, OTTMUSG00000005421 [Source:MarkerSymbol;Acc:MGI:3651509] [ENSMUST00000080265]                                                            |
| LOC671950     | A_52_P28624   | -24.927 | -1.689  | PREDICTED: Mus musculus hypothetical protein LOC671950 (LOC671950), mRNA [XM_990095]                                                                     |
| LOC673433     | A_52_P77643   | -24.865 | -1.673  | PREDICTED: Mus musculus hypothetical protein LOC673433 (LOC673433), mRNA [XM_001005577]                                                                  |
| Rps12         | A_51_P349435  | -22.678 | -1.619  | Mus musculus ribosomal protein S12 (Rps12), mRNA [NM_011295]                                                                                             |
| NAP115147-1   | A_52_P187565  | -24.552 | -1.595  | Unknown                                                                                                                                                  |
| BC115496      | A_52_P179599  | -57.789 | -1.539  | Mus musculus cDNA clone IMAGE:40100914. [BC115496]                                                                                                       |
| LOC236598     | A_52_P1021744 | -47.606 | -1.519  | Mus musculus 28S ribosomal RNA (LOC236598) [NR_003279]                                                                                                   |
| Ptprz1        | A_52_P527944  | -67.036 | -1.495  | Mus musculus mRNA for phosphacan short isoform (RPTP-beta gene). [AJ428208]                                                                              |
| Rn18s         | A_51_P338803  | -60.976 | -1.487  | Mus musculus 18S RNA (Rn18s) [NR_003278]                                                                                                                 |
| D50494        | A_51_P199266  | -55.603 | -1.430  | Mus musculus mRNA for RCK, complete cds. [D50494]                                                                                                        |
| RP23-64F17.3  | A_52_P631726  | -20.179 | -1.410  | Mus musculus similar to bM64F17.3 (putative novel protein) (LOC433728), mRNA [NM_001045534]                                                              |
| Lars2         | A_51_P314501  | -64.037 | -1.398  | Mus musculus leucyl-tRNA synthetase, mitochondrial (Lars2), nuclear gene encoding mitochondrial protein, mRNA [NM_153168]                                |
| TC1574886     | A_52_P135873  | -21.616 | -1.367  | Q66JW8_MOUSE (Q66JW8) LOC434166 protein, partial (73%) [TC1695075]                                                                                       |
| Rn18s         | A_51_P507669  | -33.361 | -1.365  | Mus musculus 18S RNA (Rn18s) [NR_003278]                                                                                                                 |

**Secondary adoptive transfer**

| Gene         | Probe ID     | J5      | FC      | annotation                                                                                                                                                                      |
|--------------|--------------|---------|---------|---------------------------------------------------------------------------------------------------------------------------------------------------------------------------------|
| Cbfb         | A_52_P586157 | -32.993 | -43.664 | Mus musculus core binding factor beta (Cbfb), mRNA [NM_022309]                                                                                                                  |
| Mknk2        | A_52_P376135 | -35.562 | -7.653  | Mus musculus MAP kinase-interacting serine/threonine kinase 2 (Mknk2), mRNA [NM_021462]                                                                                         |
| AK133468     | A_52_P208080 | -40.834 | -2.637  | Mus musculus 11 days pregnant adult female ovary and uterus cDNA, RIKEN full-length enriched library, clone:5031401G23 product:unclassifiable, full insert sequence. [AK133468] |
| BC020078     | A_52_P306965 | -33.723 | -2.312  | Mus musculus similar to hypothetical protein MGC37588, mRNA (cDNA clone MGC:28125 IMAGE:3980327), complete cds. [BC020078]                                                      |
| Phxr5        | A_52_P447424 | -45.871 | -1.885  | Mus musculus per-hexamer repeat gene 5 (Phxr5), mRNA [NM_008836]                                                                                                                |
| RP23-64F17.3 | A_52_P631726 | -31.316 | -1.869  | Mus musculus similar to bM64F17.3 (putative novel protein) (LOC433728), mRNA [NM_001045534]                                                                                     |
